# Supplementary material for: Tumor stroma with senescence-associated secretory phenotype in steatohepatitic hepatocellular carcinoma
Source: PLoS One. 2017 Mar 8;12(3):e0171922. doi: 10.1371/journal.pone.0171922 (PMC5342190; doi:10.1371/journal.pone.0171922)
Supplement: S1 Data — (XLSX) [file pone.0171922.s004.xlsx]

## Sheet: clinical and pathological data
Patient No	HCC type (0; C-HCC, 1; SH-HCC)	Age (yr)	Sex (1; Male, 2; Female)	BMI (kg/m2)	Central obesity : waist circumference >90 cm in men and >80 cm in women (0; absent, 1; present)	Low HDL cholesterol; <40 mg/dL in men and <50 mg/dL in women (0; absent, 1; present)	Diabetes; elevated fasting plasma glucose levels ≥100 mg/dL or current use of anti-diabetic medication (0; absent, 1; present)	Hypertension;systolic blood pressure ≥130 mmHg or diastolic blood pressure ≥85 mmHg or current use of blood pressure medication (0; absent, 1; present)	Hypertriglyceridemia; serum triglycerides ≥150 mg/dL or current use of antidyslipidemic medication (0; absent, 1; present)	Metabolic syndrome (0; absent 1; present)	Chronic HBV infection (0; negative, 1; positive)	Serum HBsAg (0; negative, 1; positive)	Occult HBV infection detected by PCR (0; negative, 1; positive, ND: not done)	Tumor size (cm)	Tumor differentiation	Microvessel invasion (0; absent, 1; present)	Non-tumor pathology (1=NAFLD alone, 2=NAFLD with chronic hepatitis, 3= chronic hepatitis alone)	Number of ɑ-SMA (+) CAFs	% of ɑ-SMA (+) CAFs co-expressing p21 in tumor	% of ɑ-SMA (+) CAFs co-expressing γ-H2AX in tumor	% of ɑ-SMA (+) CAFs co-expressing Ki-67 in tumor	IL-6 expression in tumor (0; negative, 1; positive)	% of ɑ-SMA (+) CAFs co-expressing IL-6 in tumor	Number of ɑ-SMA (+) HSCs in non-tumor	% of ɑSMA (+) HSCs co-expressing p21 in non-tumor	% of ɑSMA (+) HSCs co-expressing γ-H2AX in non-tumor	% of ɑSMA (+) HSCs co-expressing Ki-67 in non-tumor	IL-6 expression in non-tumor (0; negative, 1; positive)	% of ɑSMA (+) HSCs co-expressing IL-6 in non-tumor	p21 expression in tumoral hepatocyte-like cells (0; negative, 1; positive)	γ-H2AX LI in tumoral hepatocyte-like cells (%)	Ki-67 LI in tumoral hepatocyte-like cells (%)	p21 expression in non- tumoral hepatocytes (0; negative, 1; positive)	γ-H2AX LI in non- tumoral hepatocytes (%)	Ki-67 LI in non- tumoral hepatocytes (%)	Survival (0; alive, 1; dead)	Recurrence event (0; absent, 1; present)	DFS (month)	OS (month)
1	0	61	2	25.07	0	0	0	0	0	0	1	0	1	2.2	3	1	3	183	0	16.0377	1	0	0	54	0	10.3	2.6	0	0	1	3.18	10.21	1	0.3	0.4	0	0	49	49
2	0	60	1	24.09	0	0	1	1	0	1	1	0	1	3.3	2	1	3	288	0	15.4696	2.8	0	1.9	20	0	3	5.5	0	0	1	3.44	16.43	1	0.2	0.3	0	0	50	50
3	1	74	2	37.95	1	1	0	0	0	1	0	0	0	7	2	0	2	414	2.4	13.3333	0	1	3.8	250	2.4	1.4	0	0	0	1	3.54	15	1	0.5	0.1	0	0	18	18
4	1	76	1	30.66	1	0	1	1	1	1	0	0	0	4	2	0	1	431	0	22.549	2.8	1	75	120	0	4.1	5.4	1	11.9658	1	4.71	2.27	0	0.3	0.3	0	0	43	43
5	0	73	1	23.66	0	0	0	1	0	0	1	0	1	2.4	3	1	2	142	0	22.8571	3	0	0	90	0	8	5.9	0	3.66972	2	26.91	13.9	1	0.5	0.4	0	0	40	40
6	0	72	2	24.4	1	0	0	1	0	1	1	0	1	12	2	0	3	258	0	25.5556	0	0	70.1923	157	0	2.5	10.3	1	6.42202	2	24.91	21.53	0	0.3	0.1	0	1	44	44
7	0	70	1	28.63	0	1	1	1	0	1	1	0	1	3.7	3	0	2	300	0	6.52174	0	1	8.4	103	0	1	3.5	0	0	1	0.3	5.56	0	2.47	0.1	0	0	38	38
8	1	68	2	19.9	1	0	1	0	0	1	0	0	0	3.5	3	1	2	279	0.5	8.41121	0	1	34	198	0.5	7.5	12.9	1	2.12766	2	3.26	16.6	1	1.8	0.2	1	1	8	33
9	0	61	1	24.02	0	0	0	0	0	0	0	0	0	3.2	2	1	3	401	0	23.2	0	1	0	118	0	2.8	1	1	8	1	1.39	11.23	0	6.9	0.2	0	0	41	41
10	1	65	2	29.3	1	0	1	0	0	1	1	0	1	2.9	3	1	2	374	0	15.2439	3.1	1	89.1667	100	0	5.5	4.2	1	11	1	5.34	1.8	0	6.1	2.5	0	0	4	4
11	1	81	2	23.69	1	0	1	1	0	1	0	0	0	4.6	3	1	1	275	1.9	24.0964	3.9	1	89	265	1.9	13.4	0	1	22.1239	2	7.05	2.41	0	12.87	0.9	0	1	9	30
12	0	72	1	23.21	1	0	1	0	0	1	0	0	0	3	2	0	1	461	3.7	58.5938	0	0	3.4	271	3.7	4.6	1	1	0	1	2.65	1.05	0	0.3	0.3	0	0	8	8
13	0	77	1	22.41	0	0	0	1	0	0	0	0	0	3.5	3	1	3	221	0.4	16.6667	1.9	1	8.3	243	0.4	4.3	0.9	1	0	2	6.03	4.86	0	0.1	0.1	0	0	33	33
14	0	69	1	29.04	1	0	1	1	0	1	0	0	0	3.5	2	0	1	147	4.9	0.943396	0	1	0.7	103	4.9	0.8	3.1	0	6	1	0.1	0.91	0	0.1	0.1	0	0	34	34
15	0	51	2	21.36	0	1	1	1	0	1	0	0	0	16.5	3	1	3	385	2.5	15.6566	2.6	1	41.4	326	2.5	5.4	0.4	1	14	2	5.75	3.37	0	0.65	0.5	1	1	4	26
16	1	58	2	24.34	1	0	1	1	0	1	1	0	1	6.5	3	1	2	171	1.9	39.1813	0.8	1	2.9	315	1.9	6.8	6.3	0	4.85437	1	14.22	11.53	0	6.34	0.3	0	1	23	31
17	0	54	1	25.83	0	0	0	0	1	0	1	1	ND	3.2	3	0	2	227	0	59.8039	2	1	0	180	0	3.8	0	0	1	1	1.84	0.1	0	1.48	0.1	0	0	46	46
18	1	57	2	28.89	1	0	1	1	0	1	1	1	ND	4	2	0	2	185	8.2	33.1429	1.9	1	3	73	8.2	6.5	0	0	11.1111	2	21.41	0.1	1	0.65	0.5	0	1	31	51
19	1	62	2	19.3333	0	1	0	0	1	1	1	1	ND	3.2	2	0	2	323	0	28.3333	0	1	31.4502	100	0	0	2.7	1	8.91089	2	6.32	5.91	0	0.3	0.5	0	0	45	45
20	0	47	1	21.01	0	0	1	1	0	1	1	1	ND	4.3	3	1	3	187	0	2.14286	0	0	8	184	0	3.1	0.7	0	0.833333	1	0.1	0.1	0	0.3	0.1	0	0	43	43
21	1	67	2	22.58	1	0	0	1	0	1	1	1	ND	2.5	3	1	3	375	0	37.6712	2	0	0	233	0	3.9	1.8	0	3.57143	1	34.86	2.88	0	3.21	0.1	0	0	46	46
22	0	37	1	26.0617	0	0	0	1	0	0	1	1	ND	1.3	3	0	3	295	0	19.5122	2.9	0	7.9	234	0	1.7	6.4	0	3.2	2	2.2	12.63	0	0.2	0.7	0	1	8	47
23	0	54	2	23.56	0	1	0	1	0	1	1	1	ND	2.8	4	1	3	314	0	49.6575	0	1	5	210	0	12.6	5.6	0	1	2	37.44	7.3	0	7.42	0.7	0	0	43	43
24	0	68	1	25.35	1	0	0	1	0	1	1	1	ND	3	2	1	3	290	0	19	0	0	0	50	0	0	1.9	0	0	2	32.1	0.1	0	0.1	0.3	ND (explanted case)	ND (explanted case)	ND (explanted case)	ND (explanted case)
25	1	57	1	21.5645	0	0	1	1	0	1	1	1	ND	2.3	2	1	2	255	6.1	14.9485	0	1	11	114	6.1	1	16.8	1	1.92308	2	44.78	41.87	1	0.51	0.1	0	1	9	44
26	0	52	2	27.64	1	1	0	0	0	1	1	1	ND	15	3	1	3	305	0.5	23.1092	4.3	0	0	364	0.5	8.8	15.4	0	0	1	5.85	34.29	0	5.8	0.4	1	1	1	2
27	1	62	1	25.69	0	0	1	1	1	1	1	1	ND	2.2	3	0	3	465	0	15.6463	0	0	91.3	152	0	1	13.3	1	0.892857	1	39.67	3.84	0	0.2	0.1	0	0	40	40
28	0	61	2	24.98	1	0	0	0	0	0	1	1	ND	2	3	0	2	438	0	53.0488	2.2	0	31.5	212	0	0	5.1	1	3	2	10.78	5.06	0	0.2	0.3	0	0	36	36
29	0	59	2	22.15	1	0	1	0	0	1	1	1	ND	3	3	0	2	261	0	0.970874	0	0	1.6	61	0	0	2.2	0	1	1	0.1	1.75	1	0.7	5.7	1	1	10	19
30	0	56	1	23.1834	0	1	0	0	0	0	1	1	ND	3.3	2	0	2	204	1.9	7.62712	2.9	1	0	54	1.9	2.6	1.6	0	8.90411	1	16.78	1.47	0	1.4	0.1	0	0	35	35
31	0	62	1	25.462	0	0	0	1	0	0	1	1	ND	2.5	3	0	2	378	0	7.93651	1	0	6.7	164	0	2.9	11.1	1	6.79612	2	10.95	13.87	0	0.3	0.1	0	0	73	73
32	0	51	2	23.12	1	0	0	0	0	0	1	1	ND	2	2	0	3	127	0	16.5138	0	0	4.9	191	0	7.3	0	0	0	1	23.37	0.1	0	0.1	0.1	0	1	31	32
33	0	69	2	26.27	1	0	1	1	0	1	1	1	ND	2.5	3	0	2	150	2.1	6.60377	3	1	1	47	2.1	3.5	2.5	0	11.7318	2	3.95	22.76	0	0.93	1.1	0	1	17	27
34	0	66	1	27.3797	1	0	1	1	0	1	1	1	ND	1.9	3	1	3	160	2.2	21.7391	1	0	4.8	45	2.2	1	6.7	0	4.5045	1	11.98	12.9	0	0.1	0.3	0	0	30	30
35	1	54	2	32.8731	1	0	0	0	0	0	1	1	ND	3.9	1	0	2	119	4.2	8.73786	0	0	0	72	4.2	9.5	1	1	0	2	0.1	0.1	0	0.3	0.1	0	0	26	26
36	1	55	2	25.4581	1	1	1	0	0	1	1	1	ND	3.2	3	0	2	225	3.5	31.405	0	0	35.2	144	3.5	3	10.6	1	0.970874	2	15.75	3.79	0	1.2	0.6	0	0	27	27
37	1	75	1	30.5541	1	1	1	1	1	1	1	1	ND	4	2	0	2	224	6.3	49.505	0	0	37.8	159	6.3	10.3	6.5	1	8.18182	2	2.51	2.5	1	2.34	0.3	0	0	23	23
38	1	60	1	22.5	0	0	0	0	0	0	1	1	ND	1.5	2	1	2	420	1.6	64.2599	1.7	1	54.1284	429	1.6	9	2	1	13.5135	1	20.2	2.14	0	5.21	0.1	0	1	34	52
39	0	57	1	20.28	0	0	0	0	0	0	1	1	ND	4	2	1	3	169	5.3	22.6415	1.9	1	1.9	94	5.3	0.7	2	0	4.91803	2	0.2	4.18	0	0.1	0.3	0	1	12	50
40	0	41	2	21.7658	0	0	0	0	0	0	1	1	ND	2.7	3	0	3	69	0.9	21.5517	0	0	1	116	0.9	5	0	0	0	2	9.26	7.09	0	1.34	0.3	0	0	42	42
41	0	58	2	19.1406	0	0	0	0	0	0	1	1	ND	7	2	0	3	451	0.4	7.08661	1.7	1	4.4	272	0.4	5.7	3.1	1	3.8835	2	10.1	9.05	0	6.12	0.3	0	1	7	42
42	0	40	2	19.28	0	0	0	0	0	0	1	1	ND	5.5	3	1	3	169	0	7.69231	0	0	4.7	186	0	4.7	4.6	0	0.757576	2	5.74	2.49	0	1.4	0.1	0	1	20	42
43	1	67	2	23.78	1	0	0	0	0	0	1	1	ND	0.8	1	0	3	260	2.8	45.5172	0	0	0	72	2.8	4.2	4	0	0	2	5.27	0.3	1	0.3	0.1	0	0	36	36
44	0	64	2	22.0604	1	0	1	0	0	1	1	1	ND	5	2	0	3	169	0	20	0	0	1	55	0	3	0.8	0	0	1	7.19	0.3	1	3.18	0.1	0	0	38	38
45	0	53	2	20.5	0	0	0	0	0	0	1	1	ND	2.5	3	0	3	39	0	27.7778	2	0	7.6	46	0	5.5	0.9	0	24.6377	1	38.3	10.88	0	7.86	0.3	0	0	33	33
46	0	47	2	20.3125	0	0	0	0	0	0	1	1	ND	2.3	3	0	3	118	0	20.7921	0	0	9.6	324	0	4	3.3	1	0	2	3.5	42.1	1	8.7	0.1	0	1	7	35
47	0	53	1	27.6361	0	0	0	0	0	0	1	1	ND	5.5	3	1	2	260	0	17.6871	0	0	0	149	0	0	3.8	0	8.77193	2	6.06	12.9	0	1.19	0.3	0	0	28	28
48	0	50	2	21.7778	0	0	0	0	0	0	1	1	ND	1.9	2	0	3	105	0	3.57143	0	0	0	31	0	8.6	16.7	0	4.80769	2	0.4	17.03	1	2.83	0.3	0	0	30	30
49	0	53	1	24.0238	0	0	0	0	0	0	1	1	ND	1.6	3	1	2	131	0	6.36364	1	0	0	37	0	0	0	0	0	2	2.12	2.5	0	6.42	0.1	0	0	55	55
50	0	70	1	22.2848	0	0	0	0	0	0	1	1	ND	3	3	0	3	151	0	8.18182	0	0	3.6036	133	0	2.5	3	0	9.7561	2	27.31	1.67	0	0.37	0.1	0	0	25	25
51	1	66	1	27.64	0	0	1	1	0	1	1	0	1	3	3	0	2	255	1.2	40.3509	1	1	1.8	251	1.2	29.2	3.8	0	5	2	22.63	1.2	0	2.93	0.3	0	0	7	7
52	1	66	1	24.16	0	1	1	0	1	1	1	0	1	3	2	0	2	126	0	20.5882	0	0	2	30	0	14	0.9	0	1.94175	2	14.94	1.63	0	3.7	0.3	0	0	3	3
53	1	78	1	25.4767	0	0	0	0	0	0	0	0	0	2.2	2	1	1	337	0	48.8189	0	0	31.4	169	0	19.7	3.4	1	0	2	44.73	5.2	0	9.89	0.3	0	0	3	3
54	1	81	2	25.6	0	0	0	1	0	0	1	1	ND	2.1	2	0	2	311	1.9	7.7	0	1	0	106	1.9	7.7	0	1	5.12821	2	0.1	0.1	1	0.4	0.1	1	0	4	4
55	1	71	2	22	0	0	0	0	0	0	0	0	0	3.2	2	0	1	380	0	4.5045	0	0	0	169	0	1.8	1.6	0	0	2	0.2	0.1	0	0.1	0.2	0	1	47	79
